# Supplementary material for: Long run height and education implications of early life growth faltering: a synthetic panel analysis of 425 birth cohorts in 21 low- and middle-income countries
Source: BMC Public Health. 2019 Jul 4;19:876. doi: 10.1186/s12889-019-7203-5 (PMC6611035; doi:10.1186/s12889-019-7203-5)

## Supplemental Materials

**Table A1: Variable Descriptions**

|                                    | Variable Description                                                                                                    |
|------------------------------------|-------------------------------------------------------------------------------------------------------------------------|
| <b>Outcome Variables</b>           |                                                                                                                         |
| Educational attainment (years)     | Years of schooling accumulated by the respondent.                                                                       |
| Adult height (cm)                  | Height of the respondent, in cm.                                                                                        |
| <b>Height (Exposure) Variables</b> |                                                                                                                         |
| Under-5 childhood HAZ              | Average country-region-cohort level height-for-age z-score (HAZ) in childhood                                           |
| Under-5 childhood stunting         | Country-region-cohort level stunting prevalence (percent of children who are stunted within a given country and region) |
| <b>Past Covariates</b>             |                                                                                                                         |
| Avg. mat. educ. in childhood       | Average maternal education in the region in childhood.                                                                  |
| Pct. urban at childhood            | Percent of the region that is urban in childhood.                                                                       |
| Pct. electricity at childhood      | Percent of the region with access to electricity in childhood.                                                          |
| Log income at childhood            | Estimated per capita income in the region at childhood.                                                                 |
| <b>Present Covariates</b>          |                                                                                                                         |
| Urban (1 = yes)                    | Binary. Place of residence, either urban (1) or rural (0).                                                              |
| Respondent age (years)             | Respondent's age, in completed years.                                                                                   |
| Female (1 = yes)                   | Binary. Whether the respondent is female (1) or male (0)                                                                |
| Household size                     | Number of household members.                                                                                            |
| Log income at adulthood            | Estimated per capita income at adulthood.                                                                               |

**Table A2: Countries and Cohort Years in the Final Sample**

| <b>Country</b>     | <b>Number of Regions</b> | <b>Year</b> | <b>N</b>       |
|--------------------|--------------------------|-------------|----------------|
| Burkina Faso       | 4                        | 2010        | 2,229          |
| Cameroon           | 5                        | 2011        | 4,692          |
| Dominican Republic | 8                        | 2007        | 1,821          |
| Dominican Republic |                          | 2013        | 4,080          |
| Egypt              | 5                        | 2008        | 1,928          |
| Ghana              | 8                        | 2008        | 1,319          |
| Ghana              | 9                        | 2014        | 2,812          |
| Haiti              | 3                        | 2012        | 2,957          |
| Jordan             | 3                        | 2007        | 3,485          |
| Jordan             |                          | 2012        | 5,401          |
| Kenya              | 7                        | 2014        | 8,513          |
| Madagascar         | 6                        | 2008        | 963            |
| Malawi             | 3                        | 2010        | 5,112          |
| Mali               | 4                        | 2006        | 743            |
| Mali               |                          | 2012        | 650            |
| Niger              | 6                        | 2012        | 3,090          |
| Nigeria            | 4                        | 2008        | 3,602          |
| Nigeria            |                          | 2013        | 7,516          |
| Pakistan           | 4                        | 2012        | 5,729          |
| Peru               | 16                       | 2009        | 1,851          |
| Peru               |                          | 2010        | 2,246          |
| Peru               |                          | 2011        | 2,803          |
| Peru               |                          | 2012        | 4,436          |
| Rwanda             | 5                        | 2010        | 3,029          |
| Senegal            | 4                        | 2010        | 2,847          |
| Senegal            |                          | 2012        | 8,485          |
| Senegal            |                          | 2014        | 2,618          |
| Tanzania           | 2                        | 2009        | 528            |
| Togo               | 5                        | 2013        | 921            |
| Uganda             | 6                        | 2006        | 413            |
| Uganda             |                          | 2011        | 1,339          |
| Zambia             | 9                        | 2013        | 6,201          |
| <b>TOTAL</b>       |                          |             | <b>104,359</b> |

**Table A3: Multivariable Regressions for the Association between Childhood Stunting and Educational Attainment in Adulthood**

| VARIABLES                               | (1)<br>Fully Adjusted<br>Pooled Sample | (2)<br>Fully Adjusted<br>Pooled Sample +<br>Adult Height | (3)<br>Fully Adjusted<br>Pooled Sample<br>WOMEN | (4)<br>Fully Adjusted<br>Pooled Sample<br>MEN |
|-----------------------------------------|----------------------------------------|----------------------------------------------------------|-------------------------------------------------|-----------------------------------------------|
| Under-5 stunting                        | -1.275<br>(-4.438 - 1.888)             | 0.433<br>(-4.017 - 4.884)                                | -1.528<br>(-5.110 - 2.055)                      | -1.308<br>(-4.123 - 1.507)                    |
| <b>Controls</b>                         |                                        |                                                          |                                                 |                                               |
| <i>Child Cohort Characteristics</i>     |                                        |                                                          |                                                 |                                               |
| Pct. urban at childhood                 | -2.860***<br>(-3.972 - -1.749)         | -3.652***<br>(-5.335 - -1.968)                           | -3.519***<br>(-4.768 - -2.270)                  | -2.039***<br>(-3.112 - -0.966)                |
| Pct. electricity at childhood           | 0.755<br>(-0.239 - 1.750)              | 0.369<br>(-0.788 - 1.526)                                | 0.558<br>(-0.661 - 1.777)                       | 0.846*<br>(-0.0413 - 1.732)                   |
| Avg. mat. educ. at childhood            | 0.745***<br>(0.447 - 1.042)            | 1.124***<br>(0.660 - 1.589)                              | 0.997***<br>(0.641 - 1.353)                     | 0.447***<br>(0.218 - 0.675)                   |
| Log income at childhood                 | 0.254<br>(-0.148 - 0.655)              | 0.00789<br>(-0.475 - 0.491)                              | 0.123<br>(-0.329 - 0.575)                       | 0.393*<br>(-0.00156 - 0.788)                  |
| <i>Adult Respondent Characteristics</i> |                                        |                                                          |                                                 |                                               |
| Female (1 = yes)                        | -0.953***<br>(-1.194 - -0.712)         | 0.840***<br>(0.235 - 1.445)                              |                                                 |                                               |
| Urban (1 = yes)                         | 2.798***<br>(2.479 - 3.117)            | 2.826***<br>(2.456 - 3.196)                              | 2.972***<br>(2.674 - 3.270)                     | 2.529***<br>(2.168 - 2.890)                   |
| Adult height (cm)                       |                                        | 0.0781***<br>(0.0676 - 0.0885)                           |                                                 |                                               |
| <b>Observations</b>                     | <b>104,359</b>                         | <b>33,998</b>                                            | <b>56,137</b>                                   | <b>48,222</b>                                 |
| <b>R-squared</b>                        | <b>0.390</b>                           | <b>0.429</b>                                             | <b>0.443</b>                                    | <b>0.315</b>                                  |

\*\*\*  $p < 0.01$ , \*\*  $p < 0.05$ , \*  $p < 0.1$

Notes: The outcome variable in all regressions is attained education in years. All models are estimated using ordinary least squares, with 95 percent confidence intervals presented in parentheses. Standard errors are clustered at the country-region-survey level. Column 1 presents results for the full sample, while columns 3 and 4 present results for the subsample of women and men, respectively.

**Table A4: Multivariable Regressions for the Association between Cohort Average Under-5 HAZ and Adult Height, Two-Way Clustering**

| VARIABLES                               | (1)<br>Fully Adjusted<br>Pooled Sample | (2)<br>Fully Adjusted<br>WOMEN | (3)<br>Fully Adjusted<br>MEN |
|-----------------------------------------|----------------------------------------|--------------------------------|------------------------------|
| Under-5 HAZ                             | 2.005**<br>(0.153 - 3.857)             | 1.878*<br>(-0.0866 - 3.843)    | 2.921*<br>(-0.580 - 6.423)   |
| <b>Controls</b>                         |                                        |                                |                              |
| <i>Child Cohort Characteristics</i>     |                                        |                                |                              |
| Pct. urban at childhood                 | -0.581<br>(-2.136 - 0.973)             | -0.754<br>(-2.449 - 0.941)     | 0.400<br>(-3.791 - 4.592)    |
| Pct. electricity at childhood           | 0.688<br>(-0.210 - 1.586)              | 0.575<br>(-0.688 - 1.838)      | 1.165<br>(-0.746 - 3.075)    |
| Avg. mat. educ. at childhood            | 0.0220<br>(-0.570 - 0.614)             | 0.0820<br>(-0.541 - 0.705)     | -0.496*<br>(-1.057 - 0.0658) |
| Log income at childhood                 | -0.577<br>(-1.351 - 0.197)             | -0.523<br>(-1.337 - 0.291)     | -0.563<br>(-1.458 - 0.331)   |
| <i>Adult Respondent Characteristics</i> |                                        |                                |                              |
| Female (1 = yes)                        | -12.06***<br>(-13.32 - -10.80)         |                                |                              |
| Urban (1 = yes)                         | 1.168***<br>(0.748 - 1.588)            | 1.185***<br>(0.739 - 1.632)    | 0.930*<br>(-0.0395 - 1.899)  |
| <b>Observations</b>                     | <b>33,998</b>                          | <b>30,414</b>                  | <b>3,584</b>                 |
| <b>R-squared</b>                        | <b>0.385</b>                           | <b>0.167</b>                   | <b>0.125</b>                 |

\*\*\*  $p < 0.01$ , \*\*  $p < 0.05$ , \*  $p < 0.1$

Notes: The outcome variable in all regressions is adult height in cm. All models are estimated using ordinary least squares, with 95 percent confidence intervals presented in parentheses. Standard errors are clustered using two-way clustering at the country and year of birth levels. Column 1 presents results for the full sample, while columns 2 and 3 present results for the subsample of women and men, respectively.

**Table A5: Multivariable Regressions for the Association between Cohort Average Under-5 HAZ and Educational Attainment in Adulthood, Two-Way Clustering**

| VARIABLES                               | (1)<br>Fully Adjusted<br>Pooled Sample | (2)<br>Fully Adjusted<br>Pooled Sample +<br>Adult Height | (3)<br>Fully Adjusted<br>Pooled Sample<br>WOMEN | (4)<br>Fully Adjusted<br>Pooled Sample<br>MEN |
|-----------------------------------------|----------------------------------------|----------------------------------------------------------|-------------------------------------------------|-----------------------------------------------|
| Under-5 HAZ                             | 0.269<br>(-1.563 - 2.102)              | -0.269<br>(-2.932 - 2.394)                               | 0.308<br>(-1.766 - 2.383)                       | 0.315<br>(-1.214 - 1.843)                     |
| <b>Controls</b>                         |                                        |                                                          |                                                 |                                               |
| <i>Child Cohort Characteristics</i>     |                                        |                                                          |                                                 |                                               |
| Pct. urban at childhood                 | -2.874**<br>(-5.032 - -0.716)          | -3.646**<br>(-7.037 - -0.255)                            | -3.538**<br>(-6.071 - -1.004)                   | -2.048**<br>(-3.730 - -0.367)                 |
| Pct. electricity at childhood           | 0.761<br>(-0.276 - 1.798)              | 0.319<br>(-1.105 - 1.744)                                | 0.562<br>(-0.550 - 1.675)                       | 0.857<br>(-0.285 - 2.000)                     |
| Avg. mat. educ. at childhood            | 0.758**<br>(0.0988 - 1.418)            | 1.144**<br>(0.101 - 2.188)                               | 1.015**<br>(0.234 - 1.795)                      | 0.456*<br>(-0.0397 - 0.952)                   |
| Log income at childhood                 | 0.275<br>(-0.246 - 0.796)              | 0.0512<br>(-0.502 - 0.605)                               | 0.154<br>(-0.344 - 0.652)                       | 0.404<br>(-0.153 - 0.961)                     |
| <i>Adult Respondent Characteristics</i> |                                        |                                                          |                                                 |                                               |
| Female (1 = yes)                        | -0.953***<br>(-1.494 - -0.412)         | 0.842<br>(-0.981 - 2.665)                                |                                                 |                                               |
| Urban (1 = yes)                         | 2.798***<br>(2.175 - 3.421)            | 2.827***<br>(2.151 - 3.502)                              | 2.973***<br>(2.384 - 3.562)                     | 2.529***<br>(1.841 - 3.217)                   |
| Adult height (cm)                       |                                        | 0.0783***<br>(0.0585 - 0.0980)                           |                                                 |                                               |
| <b>Observations</b>                     | <b>104,359</b>                         | <b>33,998</b>                                            | <b>56,137</b>                                   | <b>48,222</b>                                 |
| <b>R-squared</b>                        | <b>0.389</b>                           | <b>0.429</b>                                             | <b>0.443</b>                                    | <b>0.315</b>                                  |

\*\*\*  $p < 0.01$ , \*\*  $p < 0.05$ , \*  $p < 0.1$

Notes: The outcome variable in all regressions is attained education in years. All models are estimated using ordinary least squares, with 95 percent confidence intervals presented in parentheses. Standard errors are clustered using two-way clustering at the country and year of birth levels. Column 1 presents results for the full sample, while columns 3 and 4 present results for the subsample of women and men, respectively.

**Table A6: Multivariable Regressions for the Association between Cohort Average Under-5 HAZ and Adult Height, Including Paternal Education**

| VARIABLES                               | (1)<br>Fully Adjusted<br>Pooled Sample | (2)<br>Fully Adjusted<br>WOMEN | (3)<br>Fully Adjusted<br>MEN   |
|-----------------------------------------|----------------------------------------|--------------------------------|--------------------------------|
| Under-5 HAZ                             | 1.928***<br>(1.037 - 2.819)            | 1.726***<br>(0.755 - 2.697)    | 2.904***<br>(1.427 - 4.380)    |
| <b>Controls</b>                         |                                        |                                |                                |
| <i>Child Cohort Characteristics</i>     |                                        |                                |                                |
| Pct. urban at childhood                 | -0.624<br>(-1.935 - 0.688)             | -0.870<br>(-2.298 - 0.558)     | 0.0593<br>(-2.544 - 2.662)     |
| Pct. electricity at childhood           | 0.880**<br>(0.00461 - 1.756)           | 0.890<br>(-0.298 - 2.078)      | 0.836<br>(-0.370 - 2.041)      |
| Avg. mat. educ. at childhood            | 0.113<br>(-0.193 - 0.420)              | 0.251<br>(-0.0798 - 0.581)     | -0.576***<br>(-0.936 - -0.215) |
| Avg. pat. educ. at childhood            | -0.454<br>(-1.442 - 0.535)             | -0.797<br>(-1.810 - 0.216)     | 0.660<br>(-0.990 - 2.310)      |
| Log income at childhood                 | -0.590***<br>(-1.020 - -0.159)         | -0.532**<br>(-0.998 - -0.0657) | -0.504<br>(-1.428 - 0.420)     |
| <i>Adult Respondent Characteristics</i> |                                        |                                |                                |
| Female (1 = yes)                        | -12.06***<br>(-12.65 - -11.47)         |                                |                                |
| Urban (1 = yes)                         | 1.170***<br>(0.952 - 1.389)            | 1.190***<br>(0.965 - 1.414)    | 0.945***<br>(0.262 - 1.627)    |
| <b>Observations</b>                     | <b>33,998</b>                          | <b>30,414</b>                  | <b>3,584</b>                   |
| <b>R-squared</b>                        | <b>0.385</b>                           | <b>0.167</b>                   | <b>0.125</b>                   |

\*\*\*  $p < 0.01$ , \*\*  $p < 0.05$ , \*  $p < 0.1$

Notes: The outcome variable in all regressions is adult height in cm. All models are estimated using ordinary least squares, with 95 percent confidence intervals presented in parentheses. Standard errors are clustered at the country-region-survey year level. Column 1 presents results for the full sample, while columns 2 and 3 present results for the subsample of women and men, respectively.

**Table A7: Multivariable Regressions for the Association between Cohort Average Under-5 HAZ and Educational Attainment in Adulthood, Including Paternal Education**

| VARIABLES                               | (1)<br>Fully Adjusted<br>Pooled Sample | (2)<br>Fully Adjusted<br>Pooled Sample +<br>Adult Height | (3)<br>Fully Adjusted<br>Pooled Sample<br>WOMEN | (4)<br>Fully Adjusted<br>Pooled Sample<br>MEN |
|-----------------------------------------|----------------------------------------|----------------------------------------------------------|-------------------------------------------------|-----------------------------------------------|
| Under-5 HAZ                             | 0.341<br>(-0.585 - 1.267)              | -0.0563<br>(-1.400 - 1.287)                              | 0.386<br>(-0.658 - 1.429)                       | 0.373<br>(-0.474 - 1.220)                     |
| <b>Controls</b>                         |                                        |                                                          |                                                 |                                               |
| <i>Child Cohort Characteristics</i>     |                                        |                                                          |                                                 |                                               |
| Pct. urban at childhood                 | -2.843***<br>(-3.964 - -1.723)         | -3.500***<br>(-5.142 - -1.858)                           | -3.503***<br>(-4.778 - -2.228)                  | -2.025***<br>(-3.096 - -0.953)                |
| Pct. electricity at childhood           | 0.360<br>(-0.799 - 1.518)              | -0.276<br>(-1.726 - 1.173)                               | 0.128<br>(-1.303 - 1.559)                       | 0.532<br>(-0.440 - 1.505)                     |
| Avg. mat. educ. at childhood            | 0.621***<br>(0.317 - 0.926)            | 0.886***<br>(0.417 - 1.355)                              | 0.864***<br>(0.503 - 1.225)                     | 0.347***<br>(0.0978 - 0.595)                  |
| Avg. pat. educ. at childhood            | 0.734<br>(-0.143 - 1.611)              | 1.297*<br>(-0.193 - 2.786)                               | 0.796<br>(-0.298 - 1.890)                       | 0.594*<br>(-0.0892 - 1.277)                   |
| Log income at childhood                 | 0.316<br>(-0.0959 - 0.727)             | 0.0842<br>(-0.370 - 0.538)                               | 0.198<br>(-0.260 - 0.657)                       | 0.437**<br>(0.0310 - 0.842)                   |
| <i>Adult Respondent Characteristics</i> |                                        |                                                          |                                                 |                                               |
| Female (1 = yes)                        | -0.951***<br>(-1.191 - -0.711)         | 0.843***<br>(0.238 - 1.448)                              |                                                 |                                               |
| Urban (1 = yes)                         | 2.800***<br>(2.480 - 3.119)            | 2.818***<br>(2.449 - 3.188)                              | 2.974***<br>(2.676 - 3.272)                     | 2.531***<br>(2.170 - 2.893)                   |
| Adult height (cm)                       |                                        | 0.0785***<br>(0.0681 - 0.0890)                           |                                                 |                                               |
| <b>Observations</b>                     | <b>104,359</b>                         | <b>33,998</b>                                            | <b>56,137</b>                                   | <b>48,222</b>                                 |
| <b>R-squared</b>                        | <b>0.390</b>                           | <b>0.430</b>                                             | <b>0.444</b>                                    | <b>0.316</b>                                  |

\*\*\*  $p < 0.01$ , \*\*  $p < 0.05$ , \*  $p < 0.1$

Notes: The outcome variable in all regressions is attained education in years. All models are estimated using ordinary least squares, with 95 percent confidence intervals presented in parentheses. Standard errors are clustered at the country-region-survey year level. Column 1 presents results for the full sample, while columns 3 and 4 present results for the subsample of women and men, respectively.

**Table A8: Multivariable Regressions for the Association between Av Cohort Average Under-5 HAZ and Adult Height, Excluding Rwanda**

| VARIABLES                               | (1)<br>Fully Adjusted<br>Pooled Sample | (2)<br>Fully Adjusted<br>WOMEN | (3)<br>Fully Adjusted<br>MEN   |
|-----------------------------------------|----------------------------------------|--------------------------------|--------------------------------|
| Under-5 HAZ                             | 1.984***<br>(1.023 - 2.944)            | 1.953***<br>(0.925 - 2.981)    | 2.060***<br>(0.595 - 3.524)    |
| <b>Controls</b>                         |                                        |                                |                                |
| <i>Child Cohort Characteristics</i>     |                                        |                                |                                |
| Pct. urban at childhood                 | -0.581<br>(-1.956 - 0.793)             | -0.625<br>(-2.122 - 0.872)     | -0.650<br>(-2.828 - 1.528)     |
| Pct. electricity at childhood           | 0.682*<br>(-0.0432 - 1.408)            | 0.522<br>(-0.560 - 1.604)      | 1.028**<br>(0.0840 - 1.972)    |
| Avg. mat. educ. at childhood            | 0.0269<br>(-0.291 - 0.345)             | 0.0686<br>(-0.273 - 0.410)     | -0.377**<br>(-0.660 - -0.0933) |
| Log income at childhood                 | -0.574**<br>(-1.019 - -0.129)          | -0.562**<br>(-1.036 - -0.0866) | -0.193<br>(-1.196 - 0.811)     |
| <i>Adult Respondent Characteristics</i> |                                        |                                |                                |
| Female (1 = yes)                        | -12.44***<br>(-12.93 - -11.95)         |                                |                                |
| Urban (1 = yes)                         | 1.180***<br>(0.959 - 1.401)            | 1.207***<br>(0.984 - 1.430)    | 0.866**<br>(0.143 - 1.589)     |
| <b>Observations</b>                     | <b>32,459</b>                          | <b>29,576</b>                  | <b>2,883</b>                   |
| <b>R-squared</b>                        | <b>0.385</b>                           | <b>0.172</b>                   | <b>0.055</b>                   |

\*\*\*  $p < 0.01$ , \*\*  $p < 0.05$ , \*  $p < 0.1$

Notes: The outcome variable in all regressions is adult height in cm. All models are estimated using ordinary least squares, with 95 percent confidence intervals presented in parentheses. Standard errors are clustered at the country-region-survey year level. Column 1 presents results for the full sample, while columns 2 and 3 present results for the subsample of women and men, respectively.

**Table A9: Multivariable Regressions for the Association between Cohort Average Under-5 HAZ and Educational Attainment in Adulthood, Excluding Rwanda**

| VARIABLES                               | (1)<br>Fully Adjusted<br>Pooled Sample | (2)<br>Fully Adjusted<br>Pooled Sample +<br>Adult Height | (3)<br>Fully Adjusted<br>Pooled Sample<br>WOMEN | (4)<br>Fully Adjusted<br>Pooled Sample<br>MEN |
|-----------------------------------------|----------------------------------------|----------------------------------------------------------|-------------------------------------------------|-----------------------------------------------|
| Under-5 HAZ                             | 0.228<br>(-0.743 - 1.199)              | -0.378<br>(-1.818 - 1.062)                               | 0.258<br>(-0.839 - 1.356)                       | 0.284<br>(-0.594 - 1.162)                     |
| <b>Controls</b>                         |                                        |                                                          |                                                 |                                               |
| <i>Child Cohort Characteristics</i>     |                                        |                                                          |                                                 |                                               |
| Pct. urban at childhood                 | -2.910***<br>(-4.042 - -1.777)         | -3.720***<br>(-5.443 - -1.998)                           | -3.584***<br>(-4.858 - -2.309)                  | -2.069***<br>(-3.156 - -0.982)                |
| Pct. electricity at childhood           | 0.755<br>(-0.241 - 1.751)              | 0.285<br>(-0.921 - 1.491)                                | 0.561<br>(-0.662 - 1.784)                       | 0.847*<br>(-0.0419 - 1.735)                   |
| Avg. mat. educ. at childhood            | 0.770***<br>(0.464 - 1.076)            | 1.173***<br>(0.691 - 1.655)                              | 1.029***<br>(0.662 - 1.395)                     | 0.464***<br>(0.229 - 0.698)                   |
| Log income at childhood                 | 0.279<br>(-0.136 - 0.695)              | 0.0662<br>(-0.426 - 0.558)                               | 0.156<br>(-0.305 - 0.617)                       | 0.409*<br>(-0.00519 - 0.823)                  |
| <i>Adult Respondent Characteristics</i> |                                        |                                                          |                                                 |                                               |
| Female (1 = yes)                        | -0.967***<br>(-1.214 - -0.721)         | 0.945***<br>(0.240 - 1.649)                              |                                                 |                                               |
| Urban (1 = yes)                         | 2.813***<br>(2.489 - 3.137)            | 2.851***<br>(2.472 - 3.230)                              | 2.988***<br>(2.686 - 3.291)                     | 2.543***<br>(2.176 - 2.911)                   |
| Adult height (cm)                       |                                        | 0.0782***<br>(0.0678 - 0.0886)                           |                                                 |                                               |
| <b>Observations</b>                     | <b>101,330</b>                         | <b>32,459</b>                                            | <b>54,500</b>                                   | <b>46,830</b>                                 |
| <b>R-squared</b>                        | <b>0.390</b>                           | <b>0.431</b>                                             | <b>0.446</b>                                    | <b>0.312</b>                                  |

\*\*\*  $p < 0.01$ , \*\*  $p < 0.05$ , \*  $p < 0.1$

Notes: The outcome variable in all regressions is attained education in years. All models are estimated using ordinary least squares, with 95 percent confidence intervals presented in parentheses. Standard errors are clustered at the country-region-survey year level. Column 1 presents results for the full sample, while columns 3 and 4 present results for the subsample of women and men, respectively.

**Figure A1: Sample Construction Flowchart**

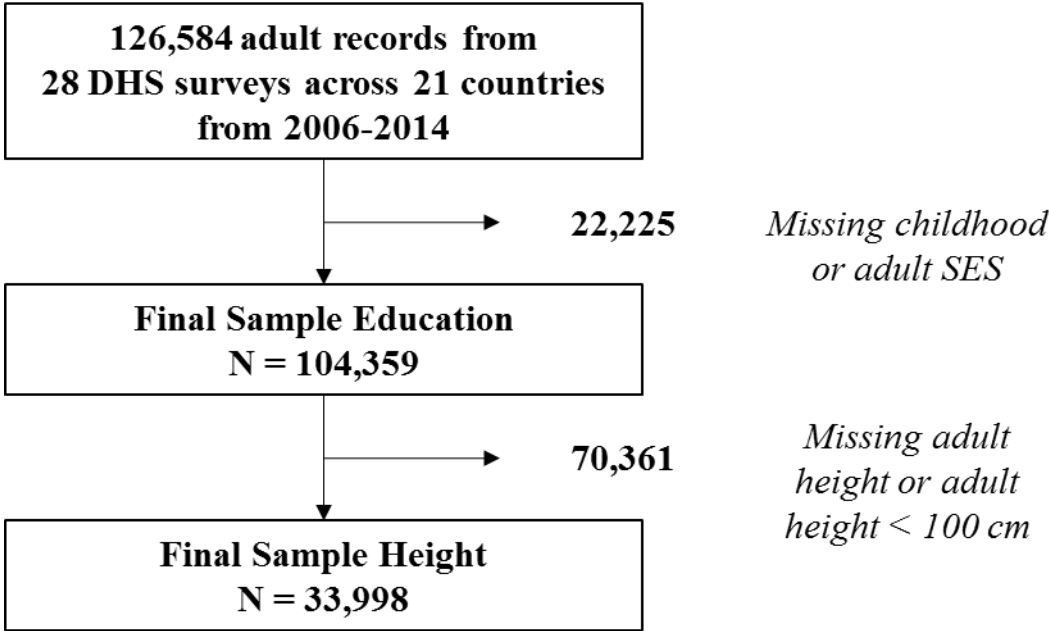

**Figure A2: Map of Countries in the Final Sample**

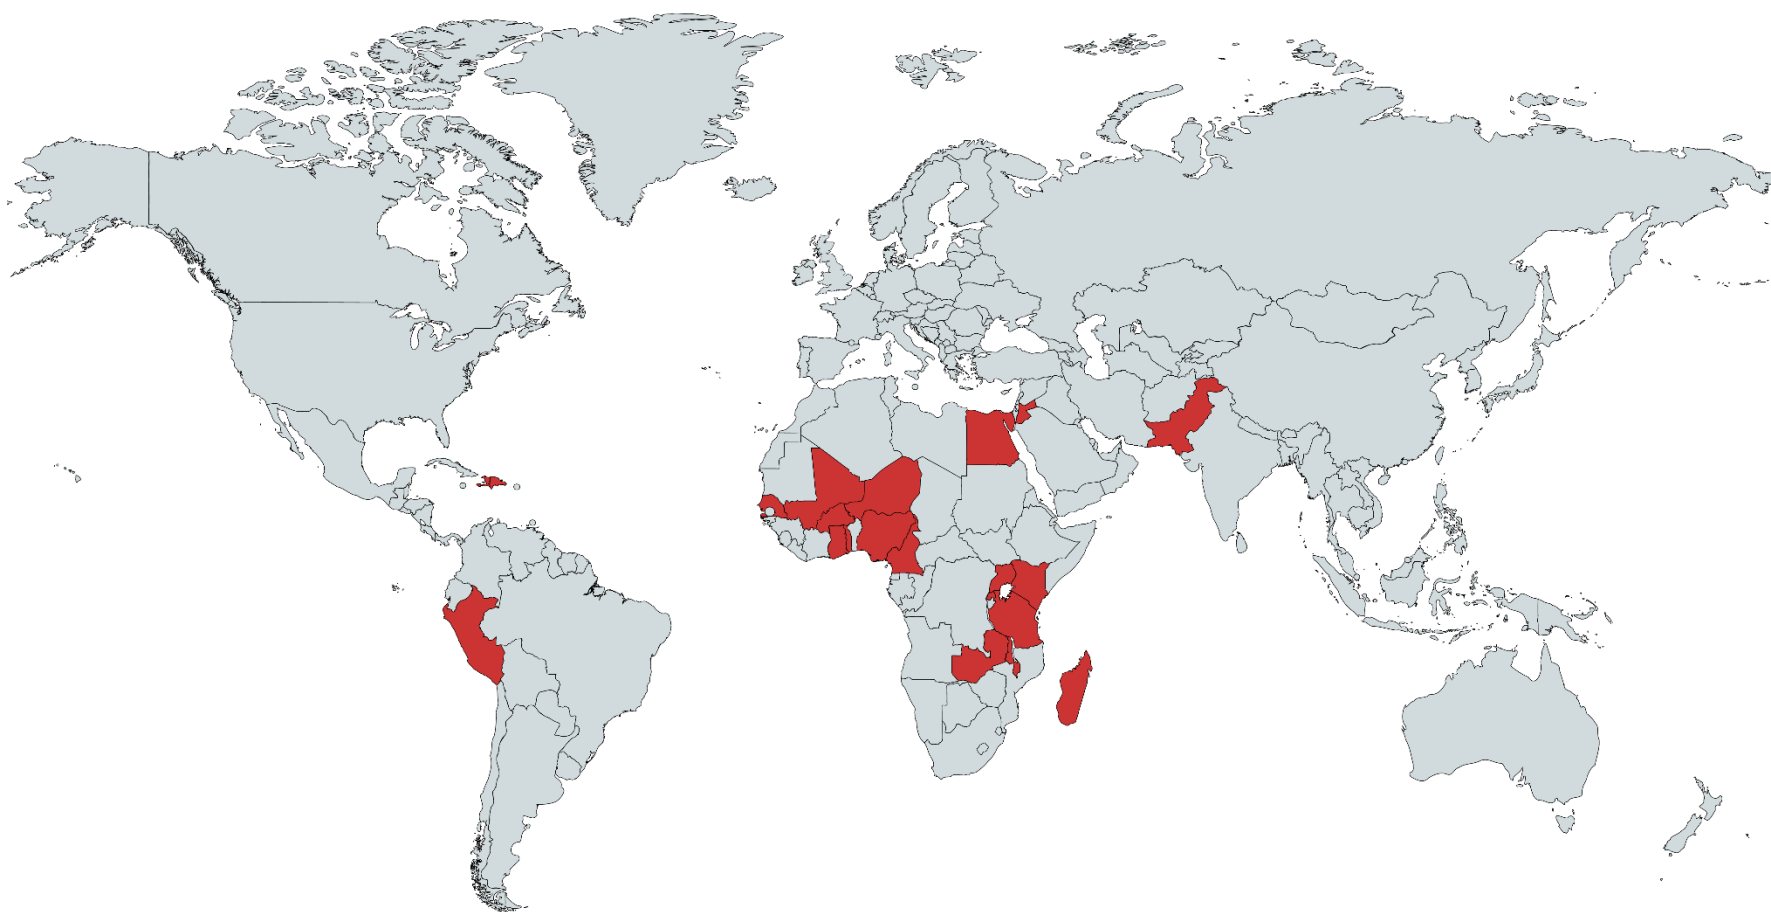

**Figure A3: Cohort-Level Correlation between Childhood HAZ, Maternal Education, and Adult Female Educational Attainment: Kenya**

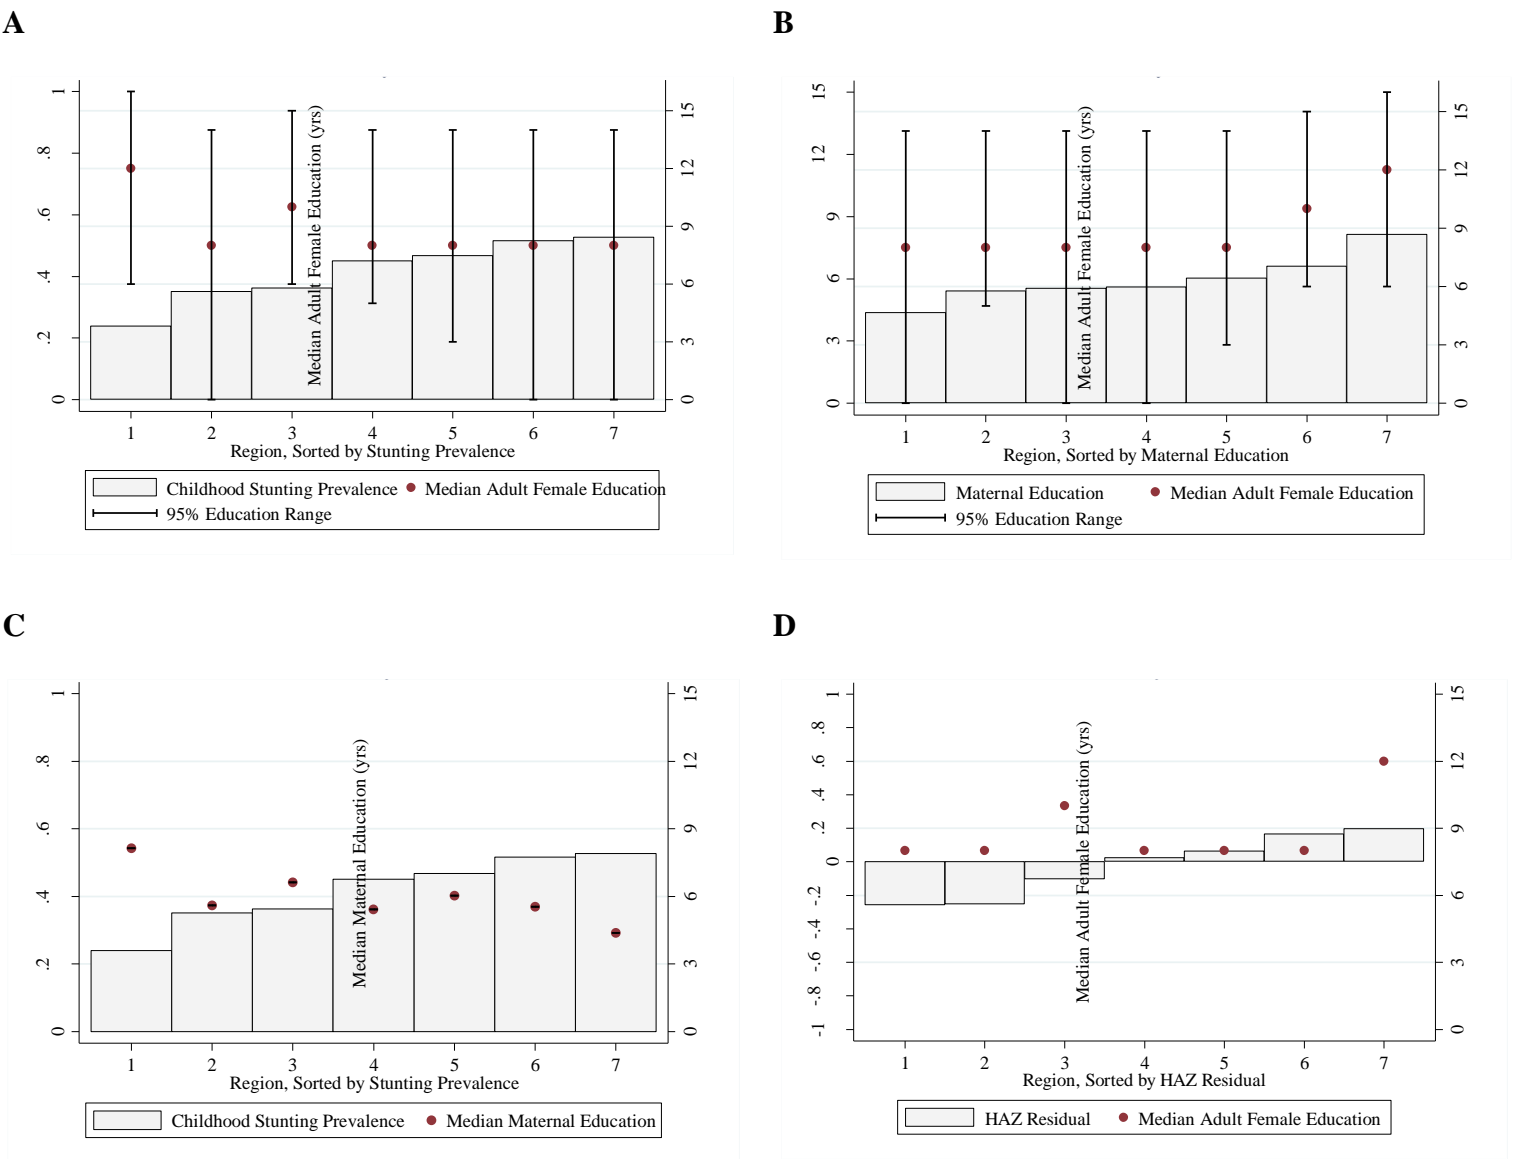

Supplement: Supplementary file 1 — Supplemental Materials. (PDF 827 kb) [file 12889_2019_7203_MOESM1_ESM.pdf]
